# Supplementary material for: Multi-Modal PET and MR Imaging in the Hen’s Egg Test-Chorioallantoic Membrane (HET-CAM) Model for Initial In Vivo Testing of Target-Specific Radioligands
Source: PubMed Central journal article supplement (PMC7281765; doi:10.3390/cancers12051248), 2020-05-15
Supplement: cancers-12-01248-s001.pdf [file cancers-12-01248-s001.pdf]

# Supplementary Materials: Multi-Modal PET and MR Imaging in the Hen's Egg Test-Chorioallantoic Membrane (HET-CAM) Model for Initial *in Vivo* Testing of Target-Specific Radioligands

Gordon Winter, Andrea B. F. Koch, Jessica Löffler, Mika Lindén, Christoph Solbach, Alireza Abaei, Hao Li, Gerhard Glatting, Ambros J. Beer and Volker Rasche

Table S1. Overview on chick embryo selection.

| Chick embryo Nr. | LNCaP C4-2 | Tumor growth |       | Injection failed [F] | Technical problems [T] | Spillover       |              |
|------------------|------------|--------------|-------|----------------------|------------------------|-----------------|--------------|
|                  |            | PC-3         | LNCaP |                      |                        | Protocolled [P] | Excluded [X] |
| 1                | +          | +            |       |                      |                        |                 |              |
| 2                | +          | +            |       |                      |                        |                 |              |
| 3                | +          | +            |       |                      |                        |                 |              |
| 4                | +          | -            |       |                      |                        |                 |              |
| 5                | +          | -            |       |                      |                        |                 |              |
| 6                | +          | +            |       |                      |                        |                 | X            |
| 7                | +          | +            |       |                      |                        |                 | X            |
| 8                | -          | -            |       |                      |                        |                 |              |
| 9                | +          | +            |       | F                    |                        |                 |              |
| 10               | +          | +            |       |                      |                        |                 |              |
| 11               | +          | +            |       |                      |                        |                 |              |
| 12               | +          | +            |       |                      |                        |                 |              |
| 13               | +          | -            |       |                      |                        |                 |              |
| 14               | -          | -            |       |                      |                        |                 |              |
| 15               | +          | +            |       |                      |                        |                 |              |
| 16               | +          | -            |       |                      |                        |                 |              |
| 17               | +          | +            |       |                      |                        |                 |              |
| 18               | +          | -            |       |                      |                        |                 |              |
| 19               | +          | +            |       | F                    |                        |                 |              |
| 20               | +          | -            |       | F                    |                        |                 |              |
| 21               | +          | +            |       |                      |                        |                 |              |
| 22               | +          | +            |       |                      |                        |                 |              |
| 23               | +          | +            |       |                      |                        |                 | P            |
| 24               | +          | +            |       |                      |                        |                 | P            |
| 25               | +          | +            |       | F                    |                        |                 |              |
| 26               | +          | +            |       |                      |                        |                 |              |
| 27               | +          | +            |       |                      |                        |                 |              |
| 28               | +          | +            |       |                      |                        |                 |              |
| 29               | +          | +            |       |                      |                        |                 |              |
| 30               | -          | +            |       |                      |                        |                 |              |
| 31               | +          | +            |       |                      |                        |                 |              |
| 32               | +          | +            |       | F                    |                        |                 |              |
| 33               | +          | +            |       |                      | T                      |                 |              |
| 34               | +          | +            |       |                      |                        |                 | X            |
| 35               | +          | +            |       | F                    |                        |                 |              |
| 36               | +          | +            |       |                      |                        |                 |              |
| 37               | -          | -            |       |                      |                        |                 |              |
| 38               | +          | +            |       |                      |                        |                 |              |
| 39               | +          | +            |       | F                    |                        |                 |              |
| 40               | +          | +            |       |                      |                        |                 |              |
| 41               | +          | +            |       |                      |                        |                 |              |
| 42               | +          | +            |       |                      |                        |                 |              |
| 43               | +          | +            |       |                      |                        |                 |              |
| 44               | +          | +            |       |                      |                        |                 |              |
| 45               | +          | +            |       |                      |                        |                 | P            |
| 46               | +          | +            |       |                      |                        |                 | X            |
| 47               | +          | +            |       |                      |                        |                 |              |
| 48               | +          | +            |       | F                    |                        |                 |              |
| 49               | +          | +            |       | F                    |                        |                 |              |
| 50               | +          | +            |       |                      |                        |                 |              |
| 51               | +          | +            |       |                      |                        |                 |              |
| 52               | +          | +            |       |                      |                        |                 |              |
| 53               | +          | +            |       | F                    |                        |                 |              |

|    |   |   |   |  |   |   |   |
|----|---|---|---|--|---|---|---|
| 54 | + | + |   |  |   |   | P |
| 55 | + | + |   |  |   | T |   |
| 56 |   | + | + |  |   |   | P |
| 57 |   | + | + |  | F |   |   |
| 58 |   | + | + |  |   |   |   |
| 59 |   | + | + |  | F |   |   |
| 60 |   | + | + |  |   |   |   |
| 61 | + | + |   |  | F |   |   |
| 62 | + | + |   |  |   |   |   |
| 63 | + | + |   |  |   |   |   |
| 64 | + | + |   |  | F |   |   |
| 65 | + | + |   |  |   |   |   |
| 66 | + | + |   |  |   |   |   |

**Table S2.** Gamma counter raw data and activity concentration ratios (PSMA+/PSMA-).

| Chick embryo<br>Nr. | Gamma Counter Raw Data [CPM]              |         |                   | Activity concentration ratio (PSMA <sup>+</sup> /PSMA <sup>-</sup> ) |                 |                     |
|---------------------|-------------------------------------------|---------|-------------------|----------------------------------------------------------------------|-----------------|---------------------|
|                     | PSMA <sup>+</sup><br>(LNCaP C4-2 & LNCaP) | PC-3    | Background (Mean) | LNCaP C4-2 +<br>PC-3                                                 | LNCaP +<br>PC-3 | LNCaP C4-2 +<br>CAM |
| 1                   | 19983.6                                   | 8155.4  | 40.0              |                                                                      | 2.45            |                     |
| 2                   | 15653.8                                   | 2318.1  | 32.0              |                                                                      | 4.91            |                     |
| 3                   | 109736.8                                  | 50694.6 | 85.0              |                                                                      | 2.16            |                     |
| 4                   | 56910.3                                   | 11630.6 | 35.0              |                                                                      |                 | 3.86                |
| 5                   | 51309.2                                   | 13988.6 | 30.0              |                                                                      |                 | 3.67                |
| 6                   | 16516.8                                   | 13354.4 | 22.7              |                                                                      |                 |                     |
| 7                   | 10908.3                                   | 5160.7  | 26.0              |                                                                      |                 |                     |
| 8                   | 32069.8                                   | 31222.9 | 25.7              |                                                                      |                 |                     |
| 9                   | 1507.4                                    | 543.4   | 23.0              |                                                                      |                 |                     |
| 10                  | 14661.3                                   | 8156.5  | 21.2              | 1.80                                                                 |                 |                     |
| 11                  | 18547.1                                   | 11565.3 | 20.5              | 1.61                                                                 |                 |                     |
| 12                  | 9654.8                                    | 4752.5  | 28.0              | 2.04                                                                 |                 |                     |
| 13                  | 16550.2                                   | 4018.6  | 27.0              |                                                                      |                 | 4.14                |
| 14                  | 1526.7                                    | 5363.3  | 24.0              |                                                                      |                 |                     |
| 15                  | 15157.8                                   | 15854.8 | 29.0              | 0.95                                                                 |                 |                     |
| 16                  | 6672.8                                    | 5674.2  | 20.0              |                                                                      |                 | 1.17                |
| 17                  | 28799.6                                   | 24018   | 29.1              | 1.20                                                                 |                 |                     |
| 18                  | 15960.6                                   | 182     | 39.3              |                                                                      |                 | 111.63              |
| 19                  | 1224.6                                    | 308     | 28.3              |                                                                      |                 |                     |
| 20                  | 135                                       | 118     | 23.7              |                                                                      |                 |                     |
| 21                  | 12991.7                                   | 1859.2  | 30.7              | 5.66                                                                 |                 |                     |
| 22                  | 30678.2                                   | 10075.2 | 36.6              | 2.58                                                                 |                 |                     |
| 23                  | 28284.3                                   | 7633    | 29.0              | 3.69                                                                 |                 |                     |
| 24                  | 29730.6                                   | 9248.9  | 28.3              | 3.22                                                                 |                 |                     |
| 25                  | 8750.4                                    | 5588.6  | 27.3              |                                                                      |                 |                     |
| 26                  | 16359                                     | 3403    | 28.7              | 4.85                                                                 |                 |                     |
| 27                  | 13942.1                                   | 4041.2  | 25.5              | 3.03                                                                 |                 |                     |
| 28                  | 18633.3                                   | 12828.3 | 29.0              | 1.45                                                                 |                 |                     |
| 29                  | 42113.5                                   | 2193.6  | 28.5              | 19.36                                                                |                 |                     |
| 30                  | 23011.6                                   | 571     | 20.8              |                                                                      |                 |                     |
| 31                  | 5795.5                                    | 3724.1  | 24.0              | 1.24                                                                 |                 |                     |
| 32                  | 221                                       | 211.4   | 25.8              |                                                                      |                 |                     |
| 33                  | 16401                                     | 1146.4  | 23.9              |                                                                      |                 |                     |
| 34                  | 2947.2                                    | 1483    | 24.8              |                                                                      |                 |                     |
| 35                  | 12513.1                                   | 4630.9  | 22.0              |                                                                      |                 |                     |
| 36                  | 13767.7                                   | 2633.2  | 23.6              | 5.25                                                                 |                 |                     |
| 37                  | 986.4                                     | 1990.4  | 26.0              |                                                                      |                 |                     |
| 38                  | 15174.8                                   | 13765.3 | 25.3              | 1.10                                                                 |                 |                     |
| 39                  | 18469.7                                   | 8422.5  | 26.0              |                                                                      |                 |                     |
| 40                  | 7336                                      | 5174.5  | 21.3              | 1.43                                                                 |                 |                     |
| 41                  | 2847.5                                    | 1851.7  | 23.0              | 1.55                                                                 |                 |                     |
| 42                  | 5306.4                                    | 4382.9  | 26.8              | 1.21                                                                 |                 |                     |
| 43                  | 46066.4                                   | 30551.9 | 28.3              | 1.51                                                                 |                 |                     |
| 44                  | 23202.5                                   | 7387.5  | 26.3              | 3.13                                                                 |                 |                     |
| 45                  | 45659.7                                   | 30685.3 | 27.7              | 1.49                                                                 |                 |                     |
| 46                  | 10293                                     | 3143.6  | 22.0              |                                                                      |                 |                     |
| 47                  | 5216.7                                    | 821.4   | 24.7              | 6.52                                                                 |                 |                     |
| 48                  | 1885.2                                    | 5351.1  | 26.0              |                                                                      |                 |                     |

|    |         |         |      |               |       |
|----|---------|---------|------|---------------|-------|
| 49 | 3431.5  | 3293.6  | 24.8 |               |       |
| 50 | 5668.7  | 820.9   | 22.0 | 9.41          |       |
| 51 | 8938.4  | 696.4   | 20.8 | 13.18         |       |
| 52 | 17339.4 | 16234.8 | 24.5 | 10.70         |       |
| 53 | 6304    | 3947.5  | 25.3 |               |       |
| 54 | 17837.3 | 3824    | 22.3 | 4.70          |       |
| 55 | 2817.2  | 750.9   | 19.6 |               |       |
| 56 | 48464.4 | 11470.4 | 23.5 |               | 4.21  |
| 57 | 2335.7  | 1321.9  | 22.5 |               |       |
| 58 | 27994.9 | 5633.2  | 22.5 |               | 5.00  |
| 59 | 30413.6 | 22952   | 24.0 |               |       |
| 60 | 27239.8 | 4743.1  | 26.0 |               | 5.79  |
| 61 |         |         |      |               |       |
| 62 | 15706.7 | 5547.9  | 25.5 | 1.87          |       |
| 63 | 60224.9 | 47028.4 | 26.2 | 1.27          |       |
| 64 | 15326.9 | 312     | 26.1 |               |       |
| 65 | 4549.8  | 1385.8  | 24.3 | 3.33          |       |
| 66 | 2733.2  | 442     | 23.7 | 6.50          |       |
|    |         |         |      | <b>n</b>      | 34    |
|    |         |         |      | <b>Mean</b>   | 4.01  |
|    |         |         |      | <b>SD</b>     | 3.98  |
|    |         |         |      | <b>Median</b> | 2.52  |
|    |         |         |      |               | 3     |
|    |         |         |      |               | 5     |
|    |         |         |      |               | 24.89 |
|    |         |         |      |               | 48.50 |
|    |         |         |      |               | 3.86  |

**Table S3.** Gamma counter data [%IA/ and activity ratios (PSMA<sup>+</sup>/PSMA<sup>-</sup>) based on %IA and on PET data.

| Chick embryo Nr. | Gamma Counter Data [%ID] |      |              |      |                  |       | Activity ratio (based on %ID)           |              |                  | Activity ratio based on PET data        |              |                  |
|------------------|--------------------------|------|--------------|------|------------------|-------|-----------------------------------------|--------------|------------------|-----------------------------------------|--------------|------------------|
|                  | [LNCaP C4-2+PC-3]        |      | [LNCaP+PC-3] |      | [LNCaP C4-2+CAM] |       | (PSMA <sup>+</sup> /PSMA <sup>-</sup> ) |              |                  | (PSMA <sup>+</sup> /PSMA <sup>-</sup> ) |              |                  |
|                  | LNCaP C4-2               | PC-3 | LNCaP        | PC-3 | LNCaP C4-2       | CAM   | LNCaP C4-2 + PC-3                       | LNCaP + PC-3 | LNCaP C4-2 + CAM | LNCaP C4-2 + PC-3                       | LNCaP + PC-3 | LNCaP C4-2 + CAM |
| 1                | 0.13                     | 0.05 |              |      |                  |       | 2.6                                     |              |                  | 2.4                                     |              |                  |
| 2                | 0.49                     | 0.07 |              |      |                  |       | 7.0                                     |              |                  | 1.9                                     |              |                  |
| 3                | 0.28                     | 0.13 |              |      |                  |       | 2.2                                     |              |                  | 1.8                                     |              |                  |
| 4                |                          |      |              |      | 0.34             | 0.07  |                                         |              | 4.9              |                                         |              | 2.0              |
| 5                |                          |      |              |      | 0.24             | 0.07  |                                         |              | 3.4              |                                         |              | 3.7              |
| 6                |                          |      |              |      |                  |       |                                         |              |                  |                                         |              |                  |
| 7                |                          |      |              |      |                  |       |                                         |              |                  |                                         |              |                  |
| 8                |                          |      |              |      |                  |       |                                         |              |                  |                                         |              |                  |
| 9                |                          |      |              |      |                  |       |                                         |              |                  |                                         |              |                  |
| 10               | 0.26                     | 0.14 |              |      |                  |       | 1.9                                     |              |                  | 3.2                                     |              |                  |
| 11               | 0.11                     | 0.07 |              |      |                  |       | 1.6                                     |              |                  | 1.5                                     |              |                  |
| 12               | 0.12                     | 0.06 |              |      |                  |       | 2.0                                     |              |                  | 0.6                                     |              |                  |
| 13               |                          |      |              |      | 0.73             | 0.18  |                                         |              | 4.1              |                                         |              | 2.5              |
| 14               |                          |      |              |      |                  |       |                                         |              |                  |                                         |              |                  |
| 15               | 0.35                     | 0.37 |              |      |                  |       | 0.9                                     |              |                  | 1.0                                     |              |                  |
| 16               |                          |      |              |      | 0.09             | 0.08  |                                         |              | 1.1              |                                         |              | 0.9              |
| 17               | 0.43                     | 0.37 |              |      |                  |       | 1.2                                     |              |                  | 0.9                                     |              |                  |
| 18               |                          |      |              |      | 0.29             | 0.003 |                                         |              | 115.2            |                                         |              | 2.4              |
| 19               |                          |      |              |      |                  |       |                                         |              |                  |                                         |              |                  |
| 20               |                          |      |              |      |                  |       |                                         |              |                  |                                         |              |                  |
| 21               | 0.17                     | 0.02 |              |      |                  |       | 8.5                                     |              |                  | 1.3                                     |              |                  |
| 22               | 0.25                     | 0.08 |              |      |                  |       | 3.1                                     |              |                  | 1.3                                     |              |                  |
| 23               | 0.11                     | 0.03 |              |      |                  |       | 3.7                                     |              |                  | 0.3                                     |              |                  |
| 24               | 0.32                     | 0.10 |              |      |                  |       | 3.2                                     |              |                  | 1.2                                     |              |                  |
| 25               |                          |      |              |      |                  |       |                                         |              |                  |                                         |              |                  |
| 26               | 0.11                     | 0.02 |              |      |                  |       | 5.5                                     |              |                  | 2.3                                     |              |                  |
| 27               | 0.21                     | 0.06 |              |      |                  |       | 3.5                                     |              |                  | 1.8                                     |              |                  |
| 28               | 0.07                     | 0.05 |              |      |                  |       | 1.4                                     |              |                  | 2.1                                     |              |                  |
| 29               | 0.56                     | 0.03 |              |      |                  |       | 18.7                                    |              |                  | 1.9                                     |              |                  |
| 30               |                          |      |              |      |                  |       |                                         |              |                  |                                         |              |                  |
| 31               | 0.28                     | 0.18 |              |      |                  |       | 1.5                                     |              |                  | 2.0                                     |              |                  |
| 32               |                          |      |              |      |                  |       |                                         |              |                  |                                         |              |                  |
| 33               |                          |      |              |      |                  |       |                                         |              |                  |                                         |              |                  |
| 34               |                          |      |              |      |                  |       |                                         |              |                  |                                         |              |                  |
| 35               |                          |      |              |      |                  |       |                                         |              |                  |                                         |              |                  |
| 36               | 0.44                     | 0.08 |              |      |                  |       | 5.2                                     |              |                  | 2.9                                     |              |                  |
| 37               |                          |      |              |      |                  |       |                                         |              |                  |                                         |              |                  |
| 38               | 0.19                     | 0.17 |              |      |                  |       | 1.1                                     |              |                  | 2.3                                     |              |                  |
| 39               |                          |      |              |      |                  |       |                                         |              |                  |                                         |              |                  |
| 40               | 0.14                     | 0.10 |              |      |                  |       | 1.4                                     |              |                  | 0.9                                     |              |                  |
| 41               | 0.18                     | 0.12 |              |      |                  |       | 1.5                                     |              |                  | 0.4                                     |              |                  |
| 42               | 0.33                     | 0.27 |              |      |                  |       | 1.2                                     |              |                  | 0.9                                     |              |                  |
| 43               | 0.73                     | 0.49 |              |      |                  |       | 1.5                                     |              |                  | 1.6                                     |              |                  |
| 44               | 0.62                     | 0.20 |              |      |                  |       | 3.1                                     |              |                  | 0.7                                     |              |                  |
| 45               | 0.22                     | 0.15 |              |      |                  |       | 1.5                                     |              |                  | 0.3                                     |              |                  |

|               |             |             |             |             |             |             |             |             |              |             |             |             |             |  |
|---------------|-------------|-------------|-------------|-------------|-------------|-------------|-------------|-------------|--------------|-------------|-------------|-------------|-------------|--|
| 46            |             |             |             |             |             |             |             |             |              |             |             |             |             |  |
| 47            | 0.14        | 0.02        |             |             |             |             | 6.4         |             |              |             |             | 0.5         |             |  |
| 48            |             |             |             |             |             |             |             |             |              |             |             |             |             |  |
| 49            |             |             |             |             |             |             |             |             |              |             |             |             |             |  |
| 50            | 0.42        | 0.06        |             |             |             |             | 7.0         |             |              |             |             | 7.9         |             |  |
| 51            | 0.48        | 0.04        |             |             |             |             | 13.0        |             |              |             |             | 2.0         |             |  |
| 52            | 0.42        | 0.04        |             |             |             |             | 10.6        |             |              |             |             | 1.1         |             |  |
| 53            |             |             |             |             |             |             |             |             |              |             |             |             |             |  |
| 54            | 0.28        | 0.06        |             |             |             |             | 4.6         |             |              |             |             | 0.6         |             |  |
| 55            |             |             |             |             |             |             |             |             |              |             |             |             |             |  |
| 56            |             |             | 0.20        | 0.05        |             |             |             | 4.2         |              |             |             |             | 0.4         |  |
| 57            |             |             |             |             |             |             |             |             |              |             |             |             |             |  |
| 58            |             |             | 0.24        | 0.05        |             |             |             | 4.9         |              |             |             |             | 1.3         |  |
| 59            |             |             |             |             |             |             |             |             |              |             |             |             |             |  |
| 60            |             |             | 0.17        | 0.03        |             |             |             | 5.7         |              |             |             |             | 2.5         |  |
| 61            |             |             |             |             |             |             |             |             |              |             |             |             |             |  |
| 62            | 0.30        | 0.11        |             |             |             |             | 2.8         |             |              |             |             | 1.0         |             |  |
| 63            | 0.21        | 0.17        |             |             |             |             | 1.3         |             |              |             |             | 1.2         |             |  |
| 64            |             |             |             |             |             |             |             |             |              |             |             |             |             |  |
| 65            | 0.17        | 0.05        |             |             |             |             | 3.3         |             |              |             |             | 1.0         |             |  |
| 66            | 0.05        | 0.01        |             |             |             |             | 6.3         |             |              |             |             | 1.1         |             |  |
| <b>n</b>      | 34          | 34          | 3           | 3           | 5           | 5           | 34          | 3           | 5            | 34          | 34          | 3           | 5           |  |
| <b>Mean</b>   | <b>0.28</b> | <b>0.12</b> | <b>0.20</b> | <b>0.04</b> | <b>0.34</b> | <b>0.08</b> | <b>4.12</b> | <b>4.93</b> | <b>25.73</b> | <b>1.58</b> | <b>1.58</b> | <b>1.40</b> | <b>2.30</b> |  |
| <b>SD</b>     | <b>0.17</b> | <b>0.11</b> | <b>0.03</b> | <b>0.01</b> | <b>0.24</b> | <b>0.06</b> | <b>3.88</b> | <b>0.75</b> | <b>50.03</b> | <b>1.34</b> | <b>1.34</b> | <b>1.05</b> | <b>1.01</b> |  |
| <b>Median</b> | <b>0.26</b> | <b>0.08</b> | <b>0.20</b> | <b>0.05</b> | <b>0.29</b> | <b>0.07</b> | <b>2.96</b> | <b>4.92</b> | <b>4.06</b>  | <b>1.25</b> | <b>1.25</b> | <b>1.30</b> | <b>2.40</b> |  |

**Table S4.** Values of the Activity concentration ratios (Tumor/total) and the uptake concentration in [%IA/g].

| Chick embryo Nr. | Total Activity in chick embryo [MBq] | LNCaP C4-2+PC-3                   |                    |                             |              | LNCaP+PC-3                   |               |                             |              | LNCaP C4-2+CAM                    |                    |                            |                  | Activity concentration ratio (Tumor/total) |             |                |                  |           |  |
|------------------|--------------------------------------|-----------------------------------|--------------------|-----------------------------|--------------|------------------------------|---------------|-----------------------------|--------------|-----------------------------------|--------------------|----------------------------|------------------|--------------------------------------------|-------------|----------------|------------------|-----------|--|
|                  |                                      | LNCaP C4-2 [kBq/mm <sup>3</sup> ] | LNCaP C4-2 [%IA/g] | PC-3 [kBq/mm <sup>3</sup> ] | PC-3 [%IA/g] | LNCaP [kBq/mm <sup>3</sup> ] | LNCaP [%IA/g] | PC-3 [kBq/mm <sup>3</sup> ] | PC-3 [%IA/g] | LNCaP C4-2 [kBq/mm <sup>3</sup> ] | LNCaP C4-2 [%IA/g] | CAM [kBq/mm <sup>3</sup> ] | CAM [%IA/g]      | LNCaP C4-2+PC-3                            | LNCaP+PC-3  | LNCaP C4-2+CAM |                  |           |  |
|                  |                                      |                                   |                    |                             |              |                              |               |                             |              |                                   |                    |                            | LNCaP C4-2/total | PC-3/total                                 | LNCaP/total | PC-3/total     | LNCaP C4-2/total | CAM/total |  |
| 1                | 2.27                                 | 0.10                              | 4.30               | 0.04                        | 1.78         |                              |               |                             |              |                                   |                    |                            | 2.46             | 1.02                                       |             |                |                  |           |  |
| 2                | 0.51                                 | 0.06                              | 12.04              | 0.01                        | 2.45         |                              |               |                             |              |                                   |                    |                            | 6.93             | 1.41                                       |             |                |                  |           |  |
| 3                | 5.92                                 | 0.56                              | 9.39               | 0.26                        | 4.40         |                              |               |                             |              |                                   |                    |                            | 5.38             | 2.52                                       |             |                |                  |           |  |
| 4                | 4.42                                 |                                   |                    |                             |              |                              |               |                             |              | 0.40                              | 9.03               | 0.10                       | 2.36             |                                            |             |                | 6.28             | 1.64      |  |
| 5                | 2.74                                 |                                   |                    |                             |              |                              |               |                             |              | 0.22                              | 8.06               | 0.06                       | 2.22             |                                            |             |                | 4.88             | 1.35      |  |
| 6                |                                      |                                   |                    |                             |              |                              |               |                             |              |                                   |                    |                            |                  |                                            |             |                |                  |           |  |
| 7                |                                      |                                   |                    |                             |              |                              |               |                             |              |                                   |                    |                            |                  |                                            |             |                |                  |           |  |
| 8                |                                      |                                   |                    |                             |              |                              |               |                             |              |                                   |                    |                            |                  |                                            |             |                |                  |           |  |
| 9                |                                      |                                   |                    |                             |              |                              |               |                             |              |                                   |                    |                            |                  |                                            |             |                |                  |           |  |
| 10               | 1.99                                 | 0.17                              | 8.70               | 0.10                        | 4.89         |                              |               |                             |              |                                   |                    |                            | 4.80             | 2.70                                       |             |                |                  |           |  |
| 11               | 2.51                                 | 0.09                              | 3.74               | 0.06                        | 2.35         |                              |               |                             |              |                                   |                    |                            | 1.89             | 1.19                                       |             |                |                  |           |  |
| 12               | 2.10                                 | 0.08                              | 3.94               | 0.04                        | 1.96         |                              |               |                             |              |                                   |                    |                            | 2.03             | 1.01                                       |             |                |                  |           |  |
| 13               | 0.40                                 |                                   |                    |                             |              |                              |               |                             |              | 0.10                              | 24.94              | 0.02                       | 6.07             |                                            |             |                | 13.20            | 3.21      |  |
| 14               |                                      |                                   |                    |                             |              |                              |               |                             |              |                                   |                    |                            |                  |                                            |             |                |                  |           |  |
| 15               | 0.60                                 | 0.07                              | 11.74              | 0.07                        | 12.49        |                              |               |                             |              |                                   |                    |                            | 6.86             | 7.30                                       |             |                |                  |           |  |
| 16               | 1.13                                 |                                   |                    |                             |              |                              |               |                             |              | 0.04                              | 3.16               | 0.03                       | 2.76             |                                            |             |                | 1.76             | 1.53      |  |
| 17               | 1.44                                 | 0.21                              | 14.72              | 0.18                        | 12.47        |                              |               |                             |              |                                   |                    |                            | 8.07             | 6.83                                       |             |                |                  |           |  |
| 18               | 0.78                                 |                                   |                    |                             |              |                              |               |                             |              | 0.08                              | 9.68               | 0.00                       | 0.09             |                                            |             |                | 5.80             | 0.05      |  |
| 19               |                                      |                                   |                    |                             |              |                              |               |                             |              |                                   |                    |                            |                  |                                            |             |                |                  |           |  |
| 20               |                                      |                                   |                    |                             |              |                              |               |                             |              |                                   |                    |                            |                  |                                            |             |                |                  |           |  |
| 21               | 1.06                                 | 0.04                              | 3.43               | 0.01                        | 0.60         |                              |               |                             |              |                                   |                    |                            | 2.07             | 0.36                                       |             |                |                  |           |  |
| 22               | 1.00                                 | 0.12                              | 12.38              | 0.05                        | 4.85         |                              |               |                             |              |                                   |                    |                            | 7.14             | 2.80                                       |             |                |                  |           |  |
| 23               | 3.67                                 | 0.14                              | 3.86               | 0.04                        | 1.06         |                              |               |                             |              |                                   |                    |                            | 2.40             | 0.66                                       |             |                |                  |           |  |
| 24               | 2.31                                 | 0.25                              | 10.85              | 0.08                        | 3.41         |                              |               |                             |              |                                   |                    |                            | 6.33             | 1.99                                       |             |                |                  |           |  |
| 25               |                                      |                                   |                    |                             |              |                              |               |                             |              |                                   |                    |                            |                  |                                            |             |                |                  |           |  |
| 26               | 1.87                                 | 0.07                              | 3.79               | 0.01                        | 0.80         |                              |               |                             |              |                                   |                    |                            | 2.26             | 0.47                                       |             |                |                  |           |  |
| 27               | 1.01                                 | 0.07                              | 7.01               | 0.02                        | 2.34         |                              |               |                             |              |                                   |                    |                            | 4.06             | 1.36                                       |             |                |                  |           |  |
| 28               | 3.41                                 | 0.08                              | 2.29               | 0.05                        | 1.60         |                              |               |                             |              |                                   |                    |                            | 1.53             | 1.07                                       |             |                |                  |           |  |
| 29               | 1.64                                 | 0.31                              | 18.97              | 0.02                        | 1.00         |                              |               |                             |              |                                   |                    |                            | 10.48            | 0.55                                       |             |                |                  |           |  |
| 30               |                                      |                                   |                    |                             |              |                              |               |                             |              |                                   |                    |                            |                  |                                            |             |                |                  |           |  |
| 31               | 0.37                                 | 0.03                              | 7.50               | 0.02                        | 6.14         |                              |               |                             |              |                                   |                    |                            | 4.40             | 3.60                                       |             |                |                  |           |  |
| 32               |                                      |                                   |                    |                             |              |                              |               |                             |              |                                   |                    |                            |                  |                                            |             |                |                  |           |  |
| 33               |                                      |                                   |                    |                             |              |                              |               |                             |              |                                   |                    |                            |                  |                                            |             |                |                  |           |  |
| 34               |                                      |                                   |                    |                             |              |                              |               |                             |              |                                   |                    |                            | 0.00             | 0.00                                       |             |                |                  |           |  |

|               |       |      |       |      |       |      |      |      |      |      |       |      |      |       |      |      |      |      |      |
|---------------|-------|------|-------|------|-------|------|------|------|------|------|-------|------|------|-------|------|------|------|------|------|
| 35            |       |      |       |      |       |      |      |      |      |      |       |      |      |       |      |      |      |      |      |
| 36            | 0.49  | 0.07 | 14.90 | 0.01 | 2.87  |      |      |      |      |      |       |      |      | 8.34  | 1.61 |      |      |      |      |
| 37            |       |      |       |      |       |      |      |      |      |      |       |      |      |       |      |      |      |      |      |
| 38            | 1.02  | 0.07 | 6.38  | 0.06 | 5.89  |      |      |      |      |      |       |      |      | 3.58  | 3.31 |      |      |      |      |
| 39            |       |      |       |      |       |      |      |      |      |      |       |      |      |       |      |      |      |      |      |
| 40            | 0.82  | 0.04 | 4.77  | 0.03 | 3.38  |      |      |      |      |      |       |      |      | 2.57  | 1.83 |      |      |      |      |
| 41            | 0.28  | 0.02 | 6.08  | 0.01 | 3.97  |      |      |      |      |      |       |      |      | 3.42  | 2.24 |      |      |      |      |
| 42            | 0.30  | 0.03 | 11.13 | 0.03 | 9.34  |      |      |      |      |      |       |      |      | 5.88  | 4.93 |      |      |      |      |
| 43            | 1.10  | 0.27 | 24.76 | 0.18 | 16.62 |      |      |      |      |      |       |      |      | 13.90 | 9.33 |      |      |      |      |
| 44            | 1.18  | 0.25 | 20.97 | 0.08 | 6.78  |      |      |      |      |      |       |      |      | 12.74 | 4.12 |      |      |      |      |
| 45            | 1.46  | 0.11 | 7.49  | 0.07 | 5.10  |      |      |      |      |      |       |      |      | 5.02  | 3.42 |      |      |      |      |
| 46            |       |      |       |      |       |      |      |      |      |      |       |      |      |       |      |      |      |      |      |
| 47            | 0.72  | 0.03 | 4.66  | 0.01 | 0.73  |      |      |      |      |      |       |      |      | 2.79  | 0.44 |      |      |      |      |
| 48            |       |      |       |      |       |      |      |      |      |      |       |      |      |       |      |      |      |      |      |
| 49            |       |      |       |      |       |      |      |      |      |      |       |      |      |       |      |      |      |      |      |
| 50            | 0.29  | 0.04 | 14.25 | 0.00 | 1.53  |      |      |      |      |      |       |      |      | 8.90  | 0.96 |      |      |      |      |
| 51            | 0.79  | 0.13 | 16.19 | 0.01 | 1.24  |      |      |      |      |      |       |      |      | 9.84  | 0.76 |      |      |      |      |
| 52            | 5.75  | 0.82 | 14.29 | 0.08 | 1.34  |      |      |      |      |      |       |      |      | 8.12  | 0.76 |      |      |      |      |
| 53            |       |      |       |      |       |      |      |      |      |      |       |      |      |       |      |      |      |      |      |
| 54            | 0.85  | 0.08 | 9.48  | 0.02 | 2.04  |      |      |      |      |      |       |      |      | 5.19  | 1.12 |      |      |      |      |
| 55            |       |      |       |      |       |      |      |      |      |      |       |      |      |       |      |      |      |      |      |
| 56            | 4.46  |      |       |      |       | 0.32 | 7.10 | 0.08 | 1.71 |      |       |      |      |       |      | 4.57 | 1.10 |      |      |
| 57            |       |      |       |      |       |      |      |      |      |      |       |      |      |       |      |      |      |      |      |
| 58            | 1.59  |      |       |      |       | 0.13 | 8.18 | 0.03 | 1.65 |      |       |      |      |       |      | 4.56 | 0.92 |      |      |
| 59            |       |      |       |      |       |      |      |      |      |      |       |      |      |       |      |      |      |      |      |
| 60            | 2.21  |      |       |      |       | 0.12 | 5.58 | 0.02 | 0.98 |      |       |      |      |       |      | 3.00 | 0.53 |      |      |
| 61            |       |      |       |      |       |      |      |      |      |      |       |      |      |       |      |      |      |      |      |
| 62            | 0.83  | 0.06 | 6.67  | 0.03 | 3.61  |      |      |      |      |      |       |      |      | 4.31  | 2.33 |      |      |      |      |
| 63            | 3.61  | 0.26 | 7.11  | 0.20 | 5.65  |      |      |      |      |      |       |      |      | 4.69  | 3.73 |      |      |      |      |
| 64            |       |      |       |      |       |      |      |      |      |      |       |      |      |       |      |      |      |      |      |
| 65            | 0.33  | 0.02 | 5.68  | 0.01 | 1.73  |      |      |      |      |      |       |      |      | 3.28  | 1.00 |      |      |      |      |
| 66            | 0.98  | 0.02 | 1.67  | 0.00 | 0.26  |      |      |      |      |      |       |      |      | 1.06  | 0.17 |      |      |      |      |
| <b>n</b>      | 42.00 | 34   | 34    | 34   | 34    | 3    | 3    | 3    | 3    | 5    | 5     | 5    | 5    | 34    | 34   | 3    | 3    | 5    | 5    |
| <b>Mean</b>   | 1.72  | 0.14 | 9.27  | 0.06 | 4.02  | 0.19 | 6.95 | 0.04 | 1.45 | 0.17 | 10.98 | 0.04 | 2.70 | 4.68  | 2.02 | 4.05 | 0.85 | 6.38 | 1.56 |
| <b>SD</b>     | 1.45  | 0.16 | 5.61  | 0.06 | 3.78  | 0.11 | 1.31 | 0.03 | 0.41 | 0.15 | 8.22  | 0.04 | 2.15 | 3.51  | 2.14 | 0.90 | 0.29 | 4.20 | 1.12 |
| <b>Median</b> | 1.12  | 0.08 | 7.50  | 0.03 | 2.66  | 0.13 | 7.10 | 0.03 | 1.65 | 0.10 | 9.03  | 0.03 | 2.36 | 4.31  | 1.19 | 4.56 | 0.92 | 5.80 | 1.53 |

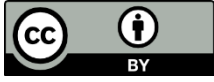

© 2020 by the authors. Submitted for possible open access publication under the terms and conditions of the Creative Commons Attribution (CC BY) license (<http://creativecommons.org/licenses/by/4.0/>).
